# Supplementary material for: Investigating the characteristics of health-related data collection tools used in randomised controlled trials in low-income and middle-income countries: protocol for a systematic review
Source: HighWire-hosted journal article supplement (doi:10.1136/bmjopen-2023-077148), 2024-01-01
Supplement: bmjopen-2023-077148supp002_data_supplement.pdf [file bmjopen-2023-077148supp002_data_supplement.pdf]

Search Strategy

| Database | Search String                                                                                                                                                                                                                                                                                                                                                                                                                                                                                                                                                                                                                                                                                                                                                                                                                                                                                                  | Filters                                                                                                                                                                |
|----------|----------------------------------------------------------------------------------------------------------------------------------------------------------------------------------------------------------------------------------------------------------------------------------------------------------------------------------------------------------------------------------------------------------------------------------------------------------------------------------------------------------------------------------------------------------------------------------------------------------------------------------------------------------------------------------------------------------------------------------------------------------------------------------------------------------------------------------------------------------------------------------------------------------------|------------------------------------------------------------------------------------------------------------------------------------------------------------------------|
| PubMed   | <p><b>#1</b></p> <p>"Digital form*" OR "Digital Data Collection Tool*" OR "Mobile Data Collection Tool*" OR "Mobile Survey Tool*" OR "Mobile Data Collection" OR "Electronic Data Collection" OR "mHealth" OR "Wearable Technology" OR "Wearable Sensor*" OR "Biosensor*" OR "Smart medical device*" OR “electronic data capture” OR “patient monitoring device*” OR “electronic medical device*” OR “digital self monitoring” OR “survey*” OR "data collection" OR "data collection tool*" OR "data entry" OR "data logging" OR "self report*" OR "self-reporting" OR "self-monitor*" OR "self test"</p> <p><b>#2</b></p> <p>"Low middle income countr*" OR "low and middle income countr*" OR "low income countr*" OR "developing countr*" OR "LMIC"</p> <p><b>#3</b></p> <p>"Randomised controlled trial*" OR "RCT" OR "RCTs" OR "randomized controlled trial"</p> <p><b>#4</b></p> <p>#1 AND #2 AND #3</p> | <p>-RCT</p> <p>-Full text</p> <p>-Adult: 19+</p> <p>-English articles only</p> <p>-Humans</p> <p>-Publication years: 2005-2023</p>                                     |
| CINAHL   | <p><b>#1</b></p> <p>"Digital form*" OR "Digital Data Collection Tool*" OR "Mobile Data Collection Tool*" OR "Mobile Survey Tool*" OR "Mobile Data Collection" OR "Electronic Data Collection" OR "mHealth" OR "Wearable Technology" OR "Wearable Sensor*" OR "Biosensor*" OR "Smart medical device*" OR “electronic data capture” OR “patient monitoring device*” OR “electronic medical device*” OR “digital self monitoring” OR “survey*” OR "data collection" OR "data</p>                                                                                                                                                                                                                                                                                                                                                                                                                                  | <p>-Exclude medline</p> <p>-Publication years: Jan 2005-June 2023</p> <p>-Adult (19-44)</p> <p>Middle aged (45-64)</p> <p>Aged (65+)</p> <p>-English articles only</p> |

|                |                                                                                                                                                                                                                                                                                                                                                                                                                                                                                                                                                                                                                                                                                                                                                                                                                                                                                                                          |                                                        |
|----------------|--------------------------------------------------------------------------------------------------------------------------------------------------------------------------------------------------------------------------------------------------------------------------------------------------------------------------------------------------------------------------------------------------------------------------------------------------------------------------------------------------------------------------------------------------------------------------------------------------------------------------------------------------------------------------------------------------------------------------------------------------------------------------------------------------------------------------------------------------------------------------------------------------------------------------|--------------------------------------------------------|
|                | <p>collection tool*" OR "data entry" OR "data logging" OR "self report*" OR "self-reporting" OR "self-monitor*" OR "self test*"</p> <p><b>#2</b><br/>"Low middle income countr*" OR "low and middle income countr*" OR "low income countr*" OR "developing countr*" OR "LMIC"</p> <p><b>#3</b><br/>"Randomised controlled trial*" OR "RCT" OR "RCTs" OR "randomized controlled trial*"</p> <p><b>#4</b><br/>#1 AND #2 AND #3</p>                                                                                                                                                                                                                                                                                                                                                                                                                                                                                         | <p>-Full-text<br/>-RCT</p>                             |
| Web of Science | <p><b>#1</b><br/>ALL=("Digital form*" OR "Digital Data Collection Tool*" OR "Mobile Data Collection Tool*" OR "Mobile Survey Tool*" OR "Mobile Data Collection" OR "Electronic Data Collection" OR "mHealth" OR "Wearable Technology" OR "Wearable Sensor*" OR "Biosensor*" OR "Smart medical device*" OR "electronic data capture" OR "patient monitoring device*" OR "electronic medical device*" OR "digital self monitoring" OR "survey*" OR "data collection" OR "data collection tool*" OR "data entry" OR "data logging" OR "self report*" OR "self-reporting" OR "self-monitor*" OR "self test*" )</p> <p><b>#2</b><br/>ALL=("Low middle income countr*" OR "low and middle income countr*" OR "low income countr*" OR "developing countr*" OR "LMIC")</p> <p><b>#3</b><br/>ALL=("Randomised controlled trial*" OR "RCT" OR "RCTs" OR "randomized controlled trial*" )</p> <p><b>#4</b><br/>#1 AND #2 AND #3</p> | <p>-Jan 2005- June 2023<br/>-English articles only</p> |

|        |                                                                                                                                                                                                                                                                                                                                                                                                                                                                                                                                                                                                                                                                                                                                                                                                                                                                                                      |                                                                                                                                                            |
|--------|------------------------------------------------------------------------------------------------------------------------------------------------------------------------------------------------------------------------------------------------------------------------------------------------------------------------------------------------------------------------------------------------------------------------------------------------------------------------------------------------------------------------------------------------------------------------------------------------------------------------------------------------------------------------------------------------------------------------------------------------------------------------------------------------------------------------------------------------------------------------------------------------------|------------------------------------------------------------------------------------------------------------------------------------------------------------|
| Embase | <p><b>#1</b><br/>"Digital form*" OR "Digital Data Collection Tool*" OR "Mobile Data Collection Tool*" OR "Mobile Survey Tool*" OR "Mobile Data Collection" OR "Electronic Data Collection" OR "mHealth" OR "Wearable Technology" OR "Wearable Sensor*" OR "Biosensor*" OR "Smart medical device*" OR “electronic data capture” OR “patient monitoring device*” OR “electronic medical device*” OR “digital self monitoring” OR “survey*” OR "data collection" OR "data collection tool*" OR "data entry" OR "data logging" OR "self report*" OR "self-reporting" OR "self-monitor*" OR "self test*"</p> <p><b>#2</b><br/>"Low middle income countr*" OR "low and middle income countr*" OR "low income countr*" OR "developing countr*" OR "LMIC"</p> <p><b>#3</b><br/>"Randomised controlled trial*" OR "RCT" OR "RCTs" OR "randomized controlled trial*"</p> <p><b>#4</b><br/>#1 AND #2 AND #3</p> | <p>- Randomized controlled trial<br/>- Publication years: 2005-2023<br/>-Adult (18-64)<br/>Aged (65+)<br/>-Exclude Medline<br/>- English articles only</p> |
|--------|------------------------------------------------------------------------------------------------------------------------------------------------------------------------------------------------------------------------------------------------------------------------------------------------------------------------------------------------------------------------------------------------------------------------------------------------------------------------------------------------------------------------------------------------------------------------------------------------------------------------------------------------------------------------------------------------------------------------------------------------------------------------------------------------------------------------------------------------------------------------------------------------------|------------------------------------------------------------------------------------------------------------------------------------------------------------|
